# Supplementary material
Source: bioRxiv or medRxiv preprint supplement (https://medrxiv.org/highwire/filestream/94795/field_highwire_adjunct_files/0/2020.08.26.20182584-1.pdf)
Supplement: Supplementary file [file 2020.08.26.20182584-1.pdf]

**\*Fernando Timoteo Fernandes<sup>1,2</sup>**

**Tiago Almeida de Oliveira<sup>1,3</sup>**

**Cristiane Esteves Teixeira<sup>1,4</sup>**

**Andre Filipe de Moraes Batista<sup>1</sup>**

**Gabriel Dalla Costa<sup>5</sup>**

**Alexandre Dias Porto Chiavegatto Filho<sup>1</sup>**

<sup>1</sup> University of São Paulo, Public Health School, São Paulo, SP, Brazil

<sup>2</sup> Fundacentro, São Paulo, SP, Brazil

<sup>3</sup> Paraíba State University, Statistics Department, Paraíba, PB, Brazil

<sup>4</sup> National Cancer Institute, Computational Biologogy and Bioinformatics Laboratory, Rio de Janeiro, RJ, Brazil

<sup>5</sup> BP - A Beneficência Portuguesa de São Paulo, SP, Brazil

Correspondence to: [fernando.fernandes@fundacentro.gov.br](mailto:fernando.fernandes@fundacentro.gov.br)

**Supplementary Table 1 - Descriptive statistics of model variables.**

| <b>Variable (unit)</b>                | <b>ICU</b>       | <b>MV</b>        | <b>Death</b>     | <b>Total</b>     |
|---------------------------------------|------------------|------------------|------------------|------------------|
| <b>Demographics</b>                   | <b>Mean (SD)</b> | <b>Mean (SD)</b> | <b>Mean (SD)</b> | <b>Mean (SD)</b> |
| Age (years)                           | 63.2 (17.1)      | 65.4(16.2)       | 73.7 (14.4)      | 51.7 (18.9)      |
| Weight (kg)                           | 79.80 (17.8)     | 78.9 (16.4)      | 74.5 (12.0)      | 80.9 (18.7)      |
| BMI                                   | 28.2 (5.4)       | 27.8(4.4)        | 27.1 (4.1)       | 28.8 (5.9)       |
| Height (cm)                           | 146.1 (56.5)     | 147.9 (55.9)     | 152.4 (47.1)     | 154.9 (44.0)     |
| <b>Gender</b>                         | <b>n (%)</b>     | <b>n (%)</b>     | <b>n (%)</b>     | <b>n (%)</b>     |
| Male (%)                              | 163 (58.0)       | 69 (65.1)        | 53 (57.6)        | 554 (53.3)       |
| <b>Race</b>                           |                  |                  |                  |                  |
| 1- Asian                              | 4 (1.4)          | 1 (0.9)          | 1 (1.1)          | 13 (1.2)         |
| 2- White                              | 200 (71.2)       | 77 (72.6)        | 75 (81.5)        | 663 (63.8)       |
| 3- Indian                             | 1 (0.4)          | 1 (0.9)          | 1 (1.1)          | 2 (0.2)          |
| 4- Black                              | 10 (3.6)         | 2 (1.9)          | 1 (1.1)          | 34 (3.2)         |
| 5- Brown                              | 45 (16.0)        | 22 (20.8)        | 12 (13.0)        | 146 (14.1)       |
| N/A                                   | 21 (7.5)         | 3 (2.8)          | 2 (2.2)          | 182 (17.5)       |
| <b>Vital Signs</b>                    | <b>Mean (SD)</b> | <b>Mean (SD)</b> | <b>Mean (SD)</b> | <b>Mean (SD)</b> |
| Heart Rate (Beats per minute)         | 91.1(16.6)       | 91.4 (17.1)      | 91.8 (18.1)      | 90.0 (14.3)      |
| Respiratory Rate (Breaths per minute) | 19.8(3.9)        | 20.4(4.8)        | 20.9 (5.0)       | 18.5 (2.9)       |
| Temperature (Celsius Degree)          | 36.8 (0.8)       | 36.7(0.8)        | 36.8 (0.8)       | 36.7 (0.7)       |
| Systolic blood pressure (mmHg)        | 126.8 (23.4)     | 126.0(25.7)      | 123.5 (26.5)     | 129.4 (19.0)     |

|                                 |             |             |             |             |
|---------------------------------|-------------|-------------|-------------|-------------|
| Diastolic blood pressure (mmHg) | 74.7 (13.9) | 72.9 (14.3) | 70.6 (15.8) | 79.5 (11.8) |
|---------------------------------|-------------|-------------|-------------|-------------|

|                          |            |           |            |            |
|--------------------------|------------|-----------|------------|------------|
| Oxygen Saturation (mmHg) | 92.5 (6.9) | 91.7(9.1) | 92.5 (6.8) | 95.3 (4.8) |
|--------------------------|------------|-----------|------------|------------|

**Blood Measures (Hemogram)**

|                   |            |            |             |            |
|-------------------|------------|------------|-------------|------------|
| Hemoglobin (g/dL) | 12.6 (2.2) | 12.1 (2.3) | 89.8 (11.5) | 13.5 (1.8) |
|-------------------|------------|------------|-------------|------------|

|                       |                    |                    |                      |                    |
|-----------------------|--------------------|--------------------|----------------------|--------------------|
| Platelet count (/mm3) | 203170.8 (88497.2) | 195971.6 (89697.8) | 181521.739 (83047.6) | 207422.1 (77468.1) |
|-----------------------|--------------------|--------------------|----------------------|--------------------|

|                        |           |           |           |           |
|------------------------|-----------|-----------|-----------|-----------|
| Red cells count (/mm3) | 4.3 (0.7) | 4.1 (0.8) | 4.0 (0.9) | 4.6 (0.6) |
|------------------------|-----------|-----------|-----------|-----------|

|                              |            |            |            |            |
|------------------------------|------------|------------|------------|------------|
| Mean Corpuscular volume (fL) | 87.6 (6.3) | 88.9 (6.8) | 89.3 (7.0) | 86.3 (5.2) |
|------------------------------|------------|------------|------------|------------|

|                                  |            |            |            |            |
|----------------------------------|------------|------------|------------|------------|
| Mean Corpuscular Hemoglobin (pg) | 29.1 (2.2) | 29.1 (2.2) | 29.2 (2.3) | 29.0 (1.9) |
|----------------------------------|------------|------------|------------|------------|

|                                                  |            |            |            |            |
|--------------------------------------------------|------------|------------|------------|------------|
| Mean Corpuscular Hemoglobin concentration (g/dL) | 33.2 (1.1) | 32.8 (1.1) | 32.7 (1.3) | 33.6 (1.1) |
|--------------------------------------------------|------------|------------|------------|------------|

|                                 |            |            |            |            |
|---------------------------------|------------|------------|------------|------------|
| Red cell distribution width (%) | 14.1 (1.9) | 14.6 (2.2) | 15.3 (2.6) | 13.4 (1.5) |
|---------------------------------|------------|------------|------------|------------|

|                         |                 |                 |                   |                 |
|-------------------------|-----------------|-----------------|-------------------|-----------------|
| Leukocytes Count (/mm3) | 8228.8 (4898.6) | 9677.6 (6269.0) | 8767.935 (5122.4) | 6594.5 (3475.5) |
|-------------------------|-----------------|-----------------|-------------------|-----------------|

|                         |                 |                 |                 |                 |
|-------------------------|-----------------|-----------------|-----------------|-----------------|
| Neutrophil Count (/mm3) | 7280.5 (4795.7) | 7699.7 (5054.4) | 6394.6 (4218.3) | 4486.3 (3093.2) |
|-------------------------|-----------------|-----------------|-----------------|-----------------|

|                       |             |             |             |             |
|-----------------------|-------------|-------------|-------------|-------------|
| Basophil Count (/mm3) | 17.6 (16.2) | 17.3 (16.5) | 16.3 (16.0) | 20.1 (17.8) |
|-----------------------|-------------|-------------|-------------|-------------|

|                         |              |              |             |              |
|-------------------------|--------------|--------------|-------------|--------------|
| Eosinophil Count (/mm3) | 47.8 (109.3) | 46.6 (118.1) | 36.3 (94.3) | 74.7 (233.1) |
|-------------------------|--------------|--------------|-------------|--------------|

|                       |               |               |               |               |
|-----------------------|---------------|---------------|---------------|---------------|
| Monocyte Count (/mm3) | 585.8 (396.2) | 620.9 (501.6) | 544.7 (377.2) | 588.1 (309.1) |
|-----------------------|---------------|---------------|---------------|---------------|

|                         |                 |                 |               |                 |
|-------------------------|-----------------|-----------------|---------------|-----------------|
| Lymphocyte count (/mm3) | 1212.6 (2214.3) | 1385.9 (3555.5) | 986.2 (670.8) | 1431.1 (1295.7) |
|-------------------------|-----------------|-----------------|---------------|-----------------|

|                            |            |             |             |           |
|----------------------------|------------|-------------|-------------|-----------|
| C Reactive Protein (mg/dL) | 10.3 (9.0) | 13.8 (10.8) | 14.4 (10.9) | 4.7 (6.7) |
|----------------------------|------------|-------------|-------------|-----------|

|                                                 |                 |                  |                    |                 |
|-------------------------------------------------|-----------------|------------------|--------------------|-----------------|
| Creatinine (mg/dL)                              | 1.5(1.4)        | 1.8 (1.7)        | 2.0 (1.7)          | 1.1 (0.9)       |
| Blood Sodium (mEq/L)                            | 137.2 (4.6)     | 137.7 (5.7)      | 137.5 (6.5)        | 137.9 (3.7)     |
| Potassium (mEq/L)                               | 4.0 (0.6)       | 4.2 (0.6)        | 4.2 (0.6)          | 4.0 (0.4)       |
| Lactate dehydrogenase level (U/L)               | 685.9 (309.9)   | 814.7 (349.6)    | 795.4 (372.2)      | 540.3 (244.6)   |
| D Dimer (ng/dL)                                 | 2498.4 (7378.8) | 3607.8 (11016.0) | 4723.793 (12336.0) | 1363.4 (4615.1) |
| Alanina aminotransferase (U/L)                  | 52.2 (99.9)     | 53.8 (85.1)      | 54.7 (37.1)        | 43.5 (71.5)     |
| Aspartate aminotransferase (U/L)                | 56.8 (72.0)     | 65.5 (81.3)      | 36.9 (34.4)        | 43.9 (52.5)     |
| Direct Bilirubin (mg/dL)                        | 0.3 (0.3)       | 0.3 (0.3)        | 0.3 (0.3)          | 0.2 (0.2)       |
| Indirect Bilirubin (mg/dL)                      | 0.1(0.1)        | 0.1 (0.1)        | 0.1 (0.1)          | 0.1 (0.1)       |
| Blood Urea (mg /dL)                             | 52.8(39.2)      | 66.0 (45.7)      | 76.0 (48.1)        | 38.0 (26.6)     |
| Troponin (mcg/L)                                | 4.3(36.9)       | 4.5 (29.3)       | 0.7 (2.6)          | 2.0 (24.1)      |
| Venous Lactate (mmol/L)                         | 15.0(6.0)       | 15.6 (4.4)       | 15.7 (6.3)         | 14.9 (6.0)      |
| Arterial Lactate (mmol/L)                       | 14.6(8.6)       | 16.3 (11.4)      | 17.2 (11.1)        | 14.1 (8.0)      |
| Creatine Phosphokinase (U/L)                    | 297.8(797.5)    | 468.3 (1187.9)   | 277.0 (690.3)      | 197.7 (540.0)   |
| Activated Partial Thromboplastin Time (seconds) | 1.1 (0.4)       | 1.1 (0.4)        | 1.1 (0.4)          | 1.1 (0.4)       |

## Arterial Blood Gas

|                                                   |              |              |              |              |
|---------------------------------------------------|--------------|--------------|--------------|--------------|
| pH                                                | 7.4 (0.0)    | 7.3 (0.0)    | 7.4 (0.08)   | 7.4 (0.1)    |
| Partial pressure of oxygen - PaO2 (mmHg)          | 109.1(49.3)  | 115.9 (51.4) | 114.6 (47.9) | 107.6 (45.1) |
| Partial pressure of carbon dioxide - PaCO2 (mmHg) | 35.8 (8.5)   | 38.2 (10.6)  | 36.5 (10.0)  | 35.0 (7.2)   |
| Bicarbonate - HCO3 (mEq/L)                        | 22.6 (3.7)   | 22.6 (4.0)   | 22.0 (4.4)   | 22.8 (3.1)   |
| Base Excess (mEq/L)                               | -0.9 (3.7)   | -1.5 (3.8)   | -1.8 (4.3)   | -0.4 (2.9)   |
| Oxygen saturation - sO2 (%)                       | 93.6(11.5)   | 93.7 (12.7)  | 94.1 (12.2)  | 94.1 (10.9)  |
| Magnesium (mmol/L)                                | 2.1 (0.3)    | 2.2 (0.3)    | 2.1 (0.3)    | 2.1 (0.3)    |
| Calcium ionised (mmol/L)                          | 1.1(0.0)     | 1.1 (0.0)    | 1.1 (0.09)   | 1.1 (0.1)    |
| Glucose (mg/dL)                                   | 155.0 (82.2) | 181.6 (91.6) | 180.0 (91.7) | 140.5 (69.3) |

## Scales and Derived measures

| Braden                               | n (%)      | n (%)     | n (%)     | n (%)      |
|--------------------------------------|------------|-----------|-----------|------------|
| <9                                   | 9 (3.4)    | 7 (6.6)   | 7 (7.6)   | 11 (1.2)   |
| 9-12                                 | 37 (14.2)  | 26 (24.5) | 22 (23.9) | 45 (4.3)   |
| 13-14                                | 39 (14.9)  | 11 (10.4) | 14 (15.2) | 41 (3.9)   |
| 15-18                                | 62 (23.8)  | 21 (19.8) | 20 (21.7) | 95 (9.1)   |
| 19-23                                | 112 (42.9) | 40 (37.7) | 27 (29.3) | 352 (33.8) |
| N/A                                  | 2 (0.8)    | 1 (0.9)   | 2 (2.2)   | 496 (47.7) |
| International Normalized Ratio (INR) | 1.2 (0.3)  | 1.2 (0.3) | 1.2 (0.3) | 1.1 (0.2)  |

|                                           |                |               |               |                  |
|-------------------------------------------|----------------|---------------|---------------|------------------|
| Neutrophil per lymphocyte (ratio)         | 7.9 (8.0)      | 10.4 (10.1)   | 10.6 (10.5)   | 4.4 (5.2)        |
| Lymphocyte per C reactive protein (ratio) | 606.8 (2215.4) | 292.1 (830.7) | 184.5 (407.2) | 4787.1 (14367.2) |

| Manchester | <b>n (%)</b> | <b>n (%)</b> | <b>n (%)</b> | <b>n (%)</b> |
|------------|--------------|--------------|--------------|--------------|
| 1          | 3 (1.1)      | 2 (1.9)      | 2 (2.2)      | 4 (0.4)      |
| 2          | 61 (21.7)    | 23 (21.7)    | 27 (29.3)    | 89 (8.5)     |
| 3          | 89 (31.7)    | 28 (26.4)    | 24 (26.1)    | 182 (17.5)   |
| 4          | 47 (16.7)    | 16 (15.1)    | 12 (13.0)    | 572 (55.0)   |
| 5          | 2 (0.7)      | 0.0 (0.0)    | 0.0 (0.0)    | 7 (0.7)      |
| N/A        | 79 (28.1)    | 37 (34.9)    | 27 (29.3)    | 186 (17.8)   |

---

**Supplementary Table 2** – Hyperparameters of the best machine learning algorithms for each final outcome and training combination.

| <b>Combination</b>   | <b>Best algorithm</b> | <b>Hyperparameters</b>                                                                                                                                          |
|----------------------|-----------------------|-----------------------------------------------------------------------------------------------------------------------------------------------------------------|
| <b>ICU + MV</b>      |                       |                                                                                                                                                                 |
| <i>predict ICU</i>   | <i>Random Forest</i>  | n_estimators = 935, max_depth=406                                                                                                                               |
| <i>predict MV</i>    |                       | max_features='log2', min_samples_leaf=2<br>min_samples_split=36                                                                                                 |
| <i>predict Death</i> |                       | max_depth=100, min_samples_leaf=4                                                                                                                               |
| <b>Only Death</b>    | <i>Extra Trees</i>    | n_estimators=135                                                                                                                                                |
| <b>ICU + Death</b>   |                       |                                                                                                                                                                 |
| <i>predict ICU</i>   | <i>XGBoost</i>        | base_score=0.5, colsample_bylevel=1<br>colsample_bynode=1, colsample_bytree=0.55<br>gamma=0.65, importance_type='gain'<br>learning_rate=0.075<br>subsample=0.55 |
| <i>predict MV</i>    |                       | max_delta_step=0, max_depth=6<br>min_child_weight=3.0<br>missing=nan                                                                                            |
| <i>predict Death</i> |                       | n_estimators=75, n_jobs=-2<br>num_parallel_tree=1, reg_alpha=1.25<br>reg_lambda=1<br>scale_pos_weight=1                                                         |
| <b>Only MV</b>       | <i>Extra Trees</i>    | max_depth=20, min_samples_leaf=4<br>n_estimators=135                                                                                                            |

---

**MV + Death**

*predict ICU* n\_estimators = 935, max\_depth=406, min\_samples\_split=36,

*Random Forest* max\_features='log2', min\_samples\_leaf=2

*predict MV*

*predict Death*

max\_depth=406, max\_features='log2', n\_estimators=935

**Only ICU** *Random Forest* min\_samples\_leaf=2, min\_samples\_split=36

---



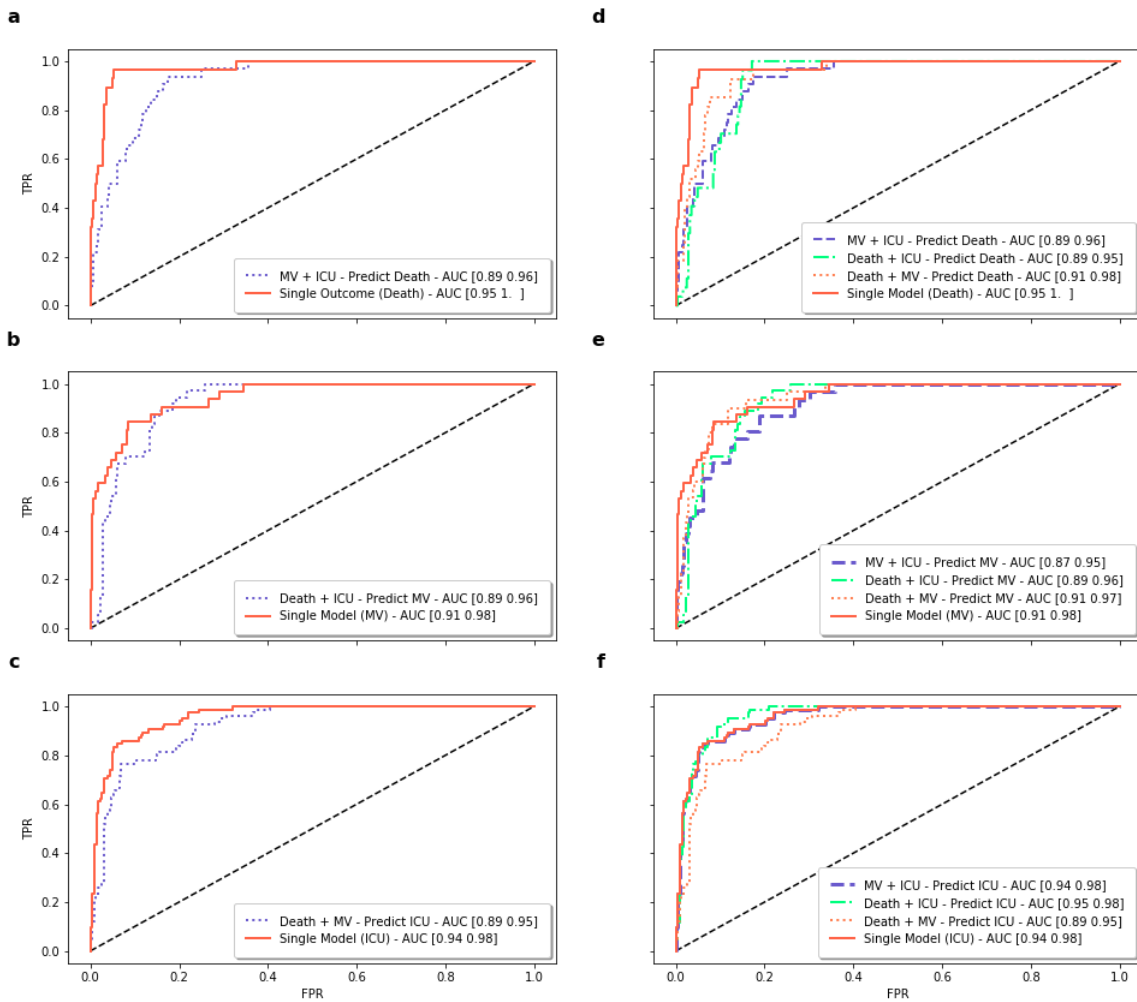

**Supplementary Figure 1.** Area under the ROC curves comparison on all possible combinations.
